# Supplementary material for: Development of a patient decision aid for the initiation of urate-lowering therapy in gout patients
Source: HighWire-hosted journal article supplement (doi:10.1136/rmdopen-2021-001979), 2022-02-01
Supplement: rmdopen-2021-001979supp001_data_supplement.pdf [file rmdopen-2021-001979supp001_data_supplement.pdf]

## Supplementary

Supplementary table S1: Usability questions by patients following the cognitive debriefing during the pilot testing.

| Domains                               | Subdomains                                                                           | Patients (n=5) |
|---------------------------------------|--------------------------------------------------------------------------------------|----------------|
| <b>Information</b>                    | Clarity of information <sup>a</sup> ; % <i>good/excellent</i>                        | 100%           |
|                                       | Length of the DA <sup>b</sup> ; % <i>just right</i>                                  | 80%            |
|                                       | Amount of information in the DA <sup>c</sup> ; % <i>just right</i>                   | 80%            |
| <b>Design</b>                         | Decision unforced <sup>d</sup> ; % <i>balanced</i>                                   | 80%            |
|                                       | Presentation of future flares <sup>e</sup> ; % <i>easy</i>                           | 100%           |
| <b>Usefulness for decision making</b> | DA useful when making a decision <sup>f</sup> ; % <i>yes</i>                         | 100%           |
|                                       | Information presented in the option grid for a decision <sup>e</sup> ; % <i>easy</i> | 80%            |
|                                       | Sufficient information to make a decision <sup>f</sup> ; % <i>yes</i>                | 100%           |

<sup>a</sup> 1 = poor, 2 = fair, 3 = good, 4 = excellent

<sup>b</sup> 1 = too long, 2 = too short, 3 = just right

<sup>c</sup> 1 = too much information, 2 = too little information, 3 = just right

<sup>d</sup> 1 = slanted towards no ULT, 2 = slanted towards ULT use, 3 = balanced

<sup>e</sup> 1 = difficult, 2 = easy

<sup>f</sup> 1 = no, 2 = yes
